# Supplementary material for: Targeting a cell state common to triple-negative breast cancers
Source: PubMed Central journal article supplement (PMC4358660; doi:10.15252/msb.20145664), 2015-02-19

# Supplementary Figure 3

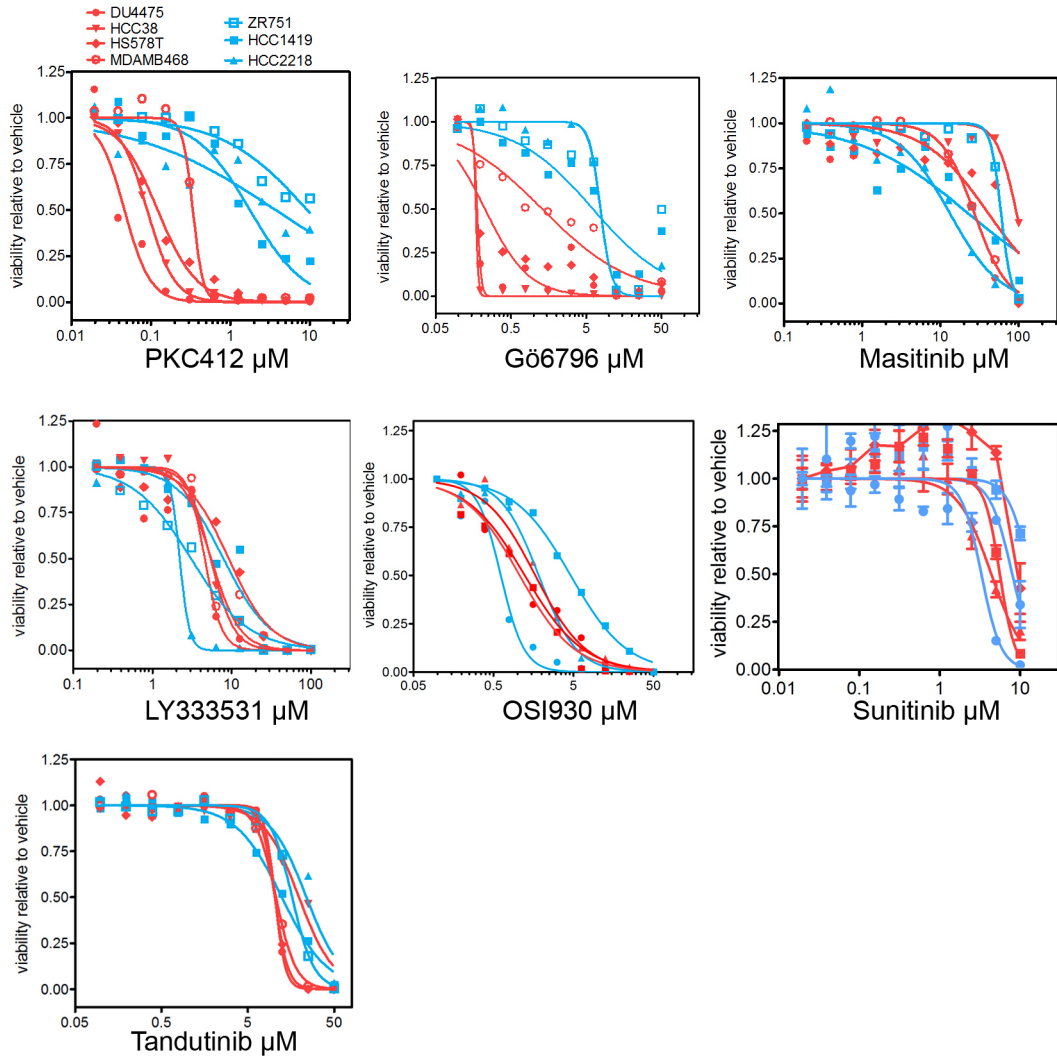

Supplement: msb0011-0789-sd3.pdf [file msb0011-0789-sd3.pdf]
